# Supplementary material
Source: publisher figshare collection journal article supplement (https://karger.figshare.com/ndownloader/files/35067745)
Supplement: Supplementary file 1 [file 35067745]

**Online Supplement Table 3**

| **Table 3:** Descriptive data of child behavioral problems and parenting stress for the subsample HBSlow. | | | | | | | | | | |
| --- | --- | --- | --- | --- | --- | --- | --- | --- | --- | --- |
|  | ***M*** | ***SD*** | **HBS total** | **QCFS**  **T1** | **QCFS**  **T2** | **CBCL**  **T3** | **CBCL**  **T4** | **PSI**  **T1** | **PSI**  **T2** | **PSI**  **T3** |
| **HBS total** | 35.79 | 8.65 |  |  |  |  |  |  |  |  |
| **QCFS T1** | 1.35 | 0.27 | -.03 |  |  |  |  |  |  |  |
| **QCFS T2** | 1.43 | 0.34 | .05 | ***.38*** |  |  |  |  |  |  |
| **CBCL T3** | 0.40 | 0.21 | .14 | .08 | **.21** |  |  |  |  |  |
| **CBCL T4** | 0.41 | 0.24 | .07 | ***.29*** | **.24** | ***.56*** |  |  |  |  |
| **PSI T1** | 1.85 | 0.54 | -.10 | ***.40*** | ***.31*** | .13 | *.16* |  |  |  |
| **PSI T2** | 1.86 | 0.52 | -.02 | **.21** | ***.34*** | **.23** | *.17* | ***.61*** |  |  |
| **PSI T3** | 2.01 | 0.55 | -.02 | *.17* | ***.35*** | ***.36*** | ***.34*** | ***.41*** | ***.51*** |  |
| **PSI T4** | 2.06 | 0.55 | .01 | ***.32*** | ***.31*** | ***.42*** | ***.61*** | ***.35*** | ***.44*** | ***.57*** |
| *Note. QCFS: Questionnaire for Crying, Feeding and Sleeping; CBCL: Child Behavior Checklist; PSI: Parenting Stress Index; HBS: “Heidelberger Belastungsskala” (N = 302, nHBSlow = 165); T1-4: child age 4 months, 6 months, 12 months, 24 months; cursive*= p<.05, two-tailed. **bold**=p<.01, two-tailed. ***bold & cursive***=p<.001, two-tailed. | | | | | | | | | | |
